# Supplementary material for: Compression of ECG signals using variable-length classifıed vector sets and wavelet transforms
Source: Springer Nature journal article supplement (doi:10.1186/1687-6180-2012-119), 2012-05-31

INPUTS OF THE DECODER PART

$L_p = 16$

$L_p = 64$

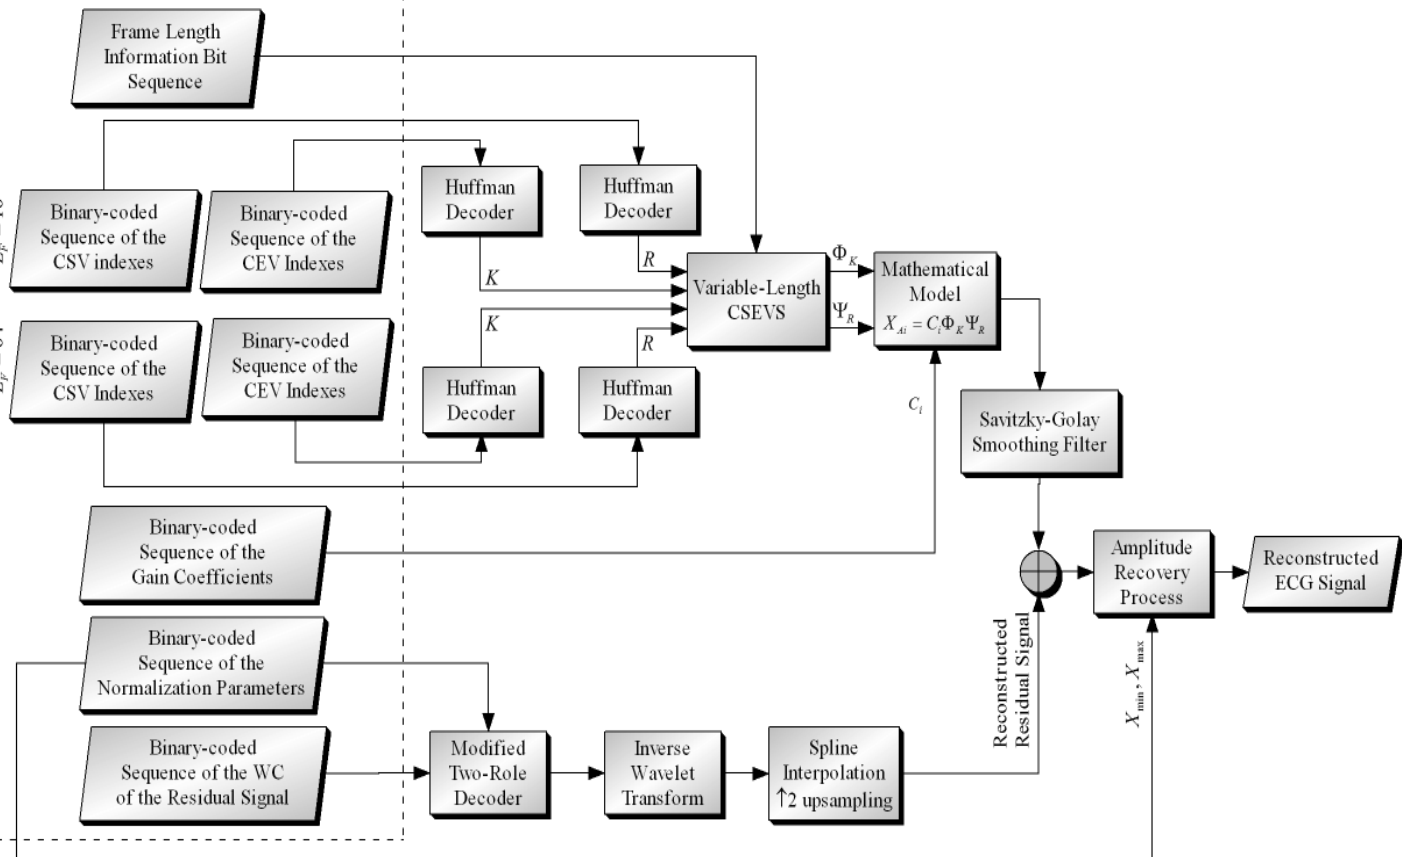

Supplement: 13634_2011_267_MOESM3_ESM.pdf [file 13634_2011_267_MOESM3_ESM.pdf]
