# Supplementary material for: Compression of ECG signals using variable-length classifıed vector sets and wavelet transforms
Source: Springer Nature journal article supplement (doi:10.1186/1687-6180-2012-119), 2012-05-31

ecg08730-02-Original Signal

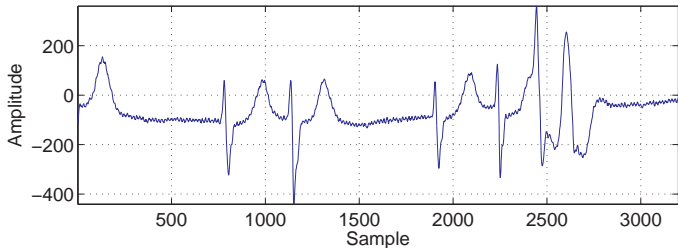

ecg08730-02-Reconstructed Signal

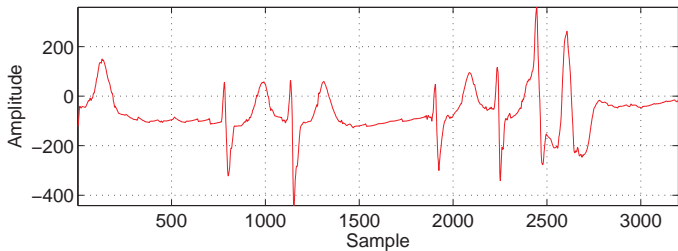

Supplement: 13634_2011_267_MOESM13_ESM.pdf [file 13634_2011_267_MOESM13_ESM.pdf]
