# Supplementary material for: Compression of ECG signals using variable-length classifıed vector sets and wavelet transforms
Source: Springer Nature journal article supplement (doi:10.1186/1687-6180-2012-119), 2012-05-31

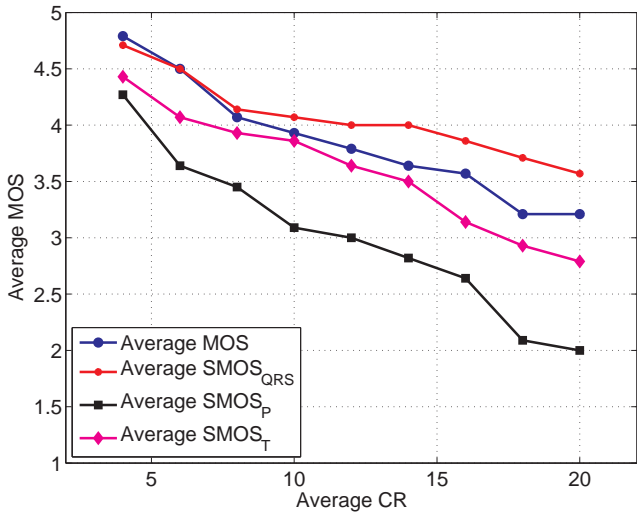

Supplement: 13634_2011_267_MOESM14_ESM.pdf [file 13634_2011_267_MOESM14_ESM.pdf]
