# Supplementary material for: Compression of ECG signals using variable-length classifıed vector sets and wavelet transforms
Source: Springer Nature journal article supplement (doi:10.1186/1687-6180-2012-119), 2012-05-31
Supplement: 13634_2011_267_MOESM16_ESM.pdf [file 13634_2011_267_MOESM16_ESM.pdf]

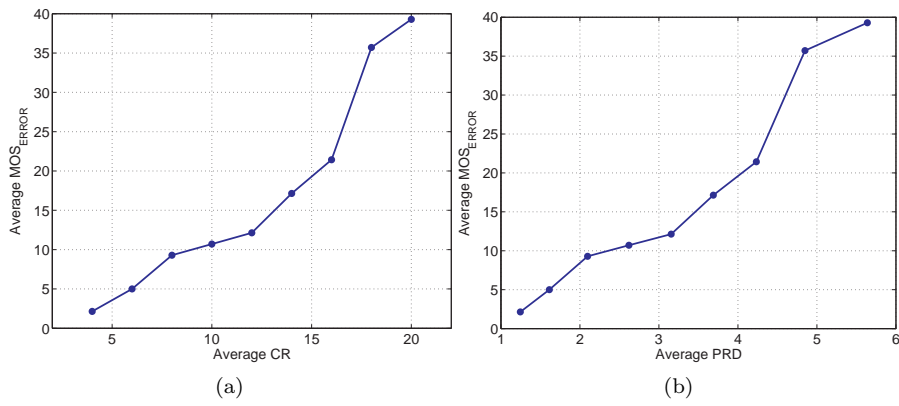

Fig. 15: The clinical evaluation of the proposed compression algorithm by means of  $MOS_{ERROR}$ , CR, and PRD: (a)The variation of the average  $MOS_{ERROR}$  with respect to the CR; (b)The variation of the average  $MOS_{ERROR}$  with respect to the PRD
