# Supplementary material for: Compression of ECG signals using variable-length classifıed vector sets and wavelet transforms
Source: Springer Nature journal article supplement (doi:10.1186/1687-6180-2012-119), 2012-05-31
Supplement: 13634_2011_267_MOESM17_ESM.pdf [file 13634_2011_267_MOESM17_ESM.pdf]

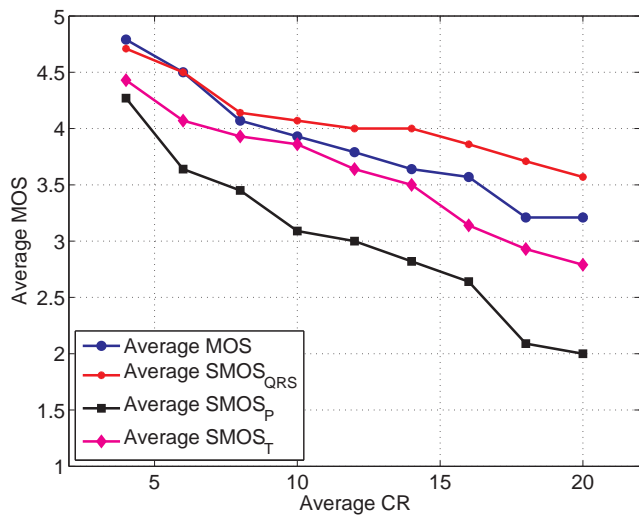

Fig. 17: The variation of the average MOS,  $SMOS_{QRS}$ ,  $SMOS_T$ , and  $SMOS_P$  with respect to the CR
